# Supplementary material for: Chiral ruthenium porphyrin encapsulated in ordered mesoporous molecular sieves (MCM-41 and MCM-48) as catalysts for asymmetric alkene epoxidation and cyclopropanationElectronic supplementary information (ESI) available: experimental section. See http://www.rsc.org/suppdata/cc/b2/b209276j/
Source: Royal Society of Chemistry journal article supplement (doi:10.1039/b209276j), 2002-11-05
Supplement: b209276j.doc [file b209276j.doc]

**Supplementary Information for *Chem. Commun.***

Chiral Ruthenium Porphyrin Encapsulated in Ordered Mesoporous Molecular Sieves (MCM-41 and MCM-48) as Catalysts for Asymmetric Alkene Epoxidation and Cyclopropanation

Jun-Long Zhanga, Yun-Ling Liua,b and Chi-Ming Chea*

aDepartment of Chemistry and Open Laboratory of Chemical Biology of Institute of Molecular Technology for Drug Discovery and Synthesis, The University of Hong Kong, Pokfulam Road, Hong Kong. Fax: (852)2857-1586; E-mail: cmche@hku.hk.

*bState Key Laboratory of Inorganic Synthesis and Preparative Chemistry, Jilin University, 119 Jiefang Road, Changchun 130023, P.R.China*

**General Experimental Procedure**

All solvents and alkenes substrates were purified by the standard procedures. Mesoporous MCM-41 and MCM-48 were prepared according to the literature procedures.1 Sodium silicate solution (27 wt % SiO2, 14 wt % NaOH), cetyltrimethylammonium bromide, and (3-aminopropyl)triethoxysilane (APTES) were obtained from Aldrich and used as received. [5,10,15,20-tetrakis-(1S,4R,5R,8S)-1,2,3,4,5,6,7,8-octahydro-1,2:5,8-dimeth ano-anthrance-9-yl] porphyrin (D4Por*) were prepared by the reported procedures.2 Infrared spectra were recorded on a BIO RAD FT-IR spectrometer. 1H NMR spectra were recorded on DPX400 Bruker FT-NMR spectrometer with chemical shifts (in ppm) relative to tetramethylsilane. UV-vis spectra were recorded on a Perkin-Elmer Lambda 19 UV/vis spectrophotometer.The UV-visible diffuse reflectance spectra of **1a-d** were performed on a Perkin-Elmer UV/vis spectrameter. X-ray powder diffraction (XRD) studies were performed using monochromatized Cu K radiation. Gas chromatography was performed on a J&W Scientific cyclodex-B (30 m) using nitrogen as the carrier gas, a flame ionization detector, and an integrator.

**Table S1.** Results of Asymmetric Epoxidation of Styrene with 2,6-Cl2pyNO Catalyzed by **1a**.*a*

| entry | solvent | temperature(C) | conv.(%)*b* | yield (%, TON)*c* | e.e.*d* |
| --- | --- | --- | --- | --- | --- |
| 1 | benzene | 25 | 79 | 86(3397) | 72 |
| 2 | CH2Cl2 | 25 | 82 | 84(3444) | 56 |
| 3 | toluene | 25 | 64 | 80(2560) | 61 |
| 4 | benzene | 40 | 95 | 83(3942) | 55 |
| 5 | CH2Cl2 | 40 | 99 | 86(4257) | 48 |

*a* Allreactions were performed for 24 h by using 0.2 mol catalyst, 1.0 mmol of substrate, and 1.1 mmol 2,6-Cl2pyNO, respectively, unless otherwise noted *b* Conversions were determined by GC using 1,4-dichlorobenzene as standard. *c*yields were based on the amount of substrates consumed. *d* Ee% of epoxides were determined by GC equipped with chiral capillary column (J&W Scientific cyclodex-B). Absolute configuration was determined by comparing with authentic chiral samples.

**Table S2.** Results of Asymmetric Epoxidation of Styrene with 2,6-Cl2pyNO Catalyzed by **1b.***a*

| entry | cycle | catalyst | conv.(%)*b* | yield (%, TON)*c* | e.e.*d* |
| --- | --- | --- | --- | --- | --- |
| 1 | 1 | **1a** | 72 | 80(11520) | 70 |
| 2 | 2 | **1a** | 56 | 82(9184) | 61 |
| 3 | 1 | **1b** | 82 | 82(13450) | 74 |
| 4 | 2 | **1b** | 76 | 83(12620) | 66 |
| 5 | 3 | **1b** | 44 | 72(6336) | 48 |

*a* Reaction condition: 2.0 mmol alkene, 2.2 mmol 2,6-Cl2pyNO, a catalytic amount of HCl (0.1% equiv.) and 0.1 mol **1a** and **1b**, room temperature for 24 h. *b* Conversions were determined by GC using 1,4-dichlorobenzene as standard. *c*yields were based on the amount of substrates consumed. *d* Ee% of epoxides were determined by GC equipped with chiral capillary column (J&W Scientific

**Table S3.** Results of Asymmetric Epoxidation of *trans*-Alkenes and with 2,6-Cl2pyNO Catalyzed by **1b.***a*

| entry | solvent | substrate | conv.(%)*b* | yield (%, TON)*c* | e.e.*d* |
| --- | --- | --- | --- | --- | --- |
| 1 | benzene |  | 56 | 98(2744) | 25 |
| 2 | benzene |  | 42 | 88(1848) | 27 |

*a* Allreactions were performed in benzene for 24 h by using 0.2 mol catalyst, 1.0 mmol of substrate, and 1.1 mmol 2,6-Cl2pyNO, respectively, unless otherwise noted *b* Conversions were determined by GC using 1,4-dichlorobenzene as standard. *c*yields were based on the amount of substrates consumed. *d* Ee% of epoxides were determined by 1H-NMR using Eu(hfp)3 as chiral shift reagent).

cyclodex-B). Absolute configuration was determined by comparing with authentic chiral samples.

**Epoxidation of cholesterol acetate using 1a, 1b and [RuII(D4-Por*)(CO)].**

A mixture of substrate (1 mmol), 2,6-dichloropyridine N-oxide (1.1 mmol), and catalyst (**1a, 1b** or [RuII(D4-Por*)(CO)]) (1 **mol) in CH2Cl2 (5 mL) was stirred under argon at 40 C. The end of the reaction was determined by 1H-NMR comparison with the previously reported 1H NMR spectral data. Isolated yield: 92%, complete ** selectivity.

**Procedure for Intramolecular Cyclopropanation of *trans*-cinnamyl diazoacetate Catalyzed by 1b.**

To a solution of **1b** (1 **mol) in dichloromethane (5 mL) was added dropwise a solution of *trans*-cinnamyl diazoacetate (2 mmol) in dichloromethane (5 mL) over 10 h at room temperature under nitrogen atmosphere. The mixture was then stirred for an additional 14 h. The end of the reaction was determined by TLC. After removal of the solvent by filtration and removal of the solvent, the product was obtained without further purification.

| entry | cycle | conv.(%)*b* | yield (%)*b* | e.e*b* | TON |
| --- | --- | --- | --- | --- | --- |
| 1 | 1 | 86 | 90 | 85 | 1540 |
| 2 | 2 | 82 | 95 | 83 | 1560 |
| 3 | 3 | 70 | 92 | 80 | 1280 |
| 4 | 4 | 68 | 92 | 76 | 1250 |

*a* All reactions were performed in dichloromethane at room temperature for 24 h with a **1b**: *trans*-cinnamyl diazoacetate ratio of 1:2000. *b*Conversion and e.e was determined by GLC equipped with chiral capillary column (J&W Scientific cyclodex-B) of the reaction mixture using the internal standard method (1,4-dichlorobenzene or chlorobenzene), error 2% of the stated values. Yield based on the alkene consumed.

**References:**

1. a) J. S. Beck; J. C. Vartuli; W. J. Roth; M. E. Leonowicz; C. T. Kresge; K. D. Schmitt; C. T.-W. Chu; D. H. Olson; E. W. Sheppard; S. B. McCullen; J. B. Higgins; J. L. Schlenker, *J. Am. Chem. Soc.* 1992, **114**, 10834. b) J. Xu; Z. Luan; H. He; W. Zhou; L. Kevan, *Chem. Mater*. 1998, **10**, 3690.
2. R. L. Halterman and S.-T. Jan, *J. Org. Chem.*, 1991, **56**, 5253
